# Supplementary material for: Pyruvate produced by Brugia spp. via glycolysis is essential for maintaining the mutualistic association between the parasite and its endosymbiont, Wolbachia
Source: PubMed Central journal article supplement (PMC6791551; doi:10.1371/journal.ppat.1008085), 2019-09-30

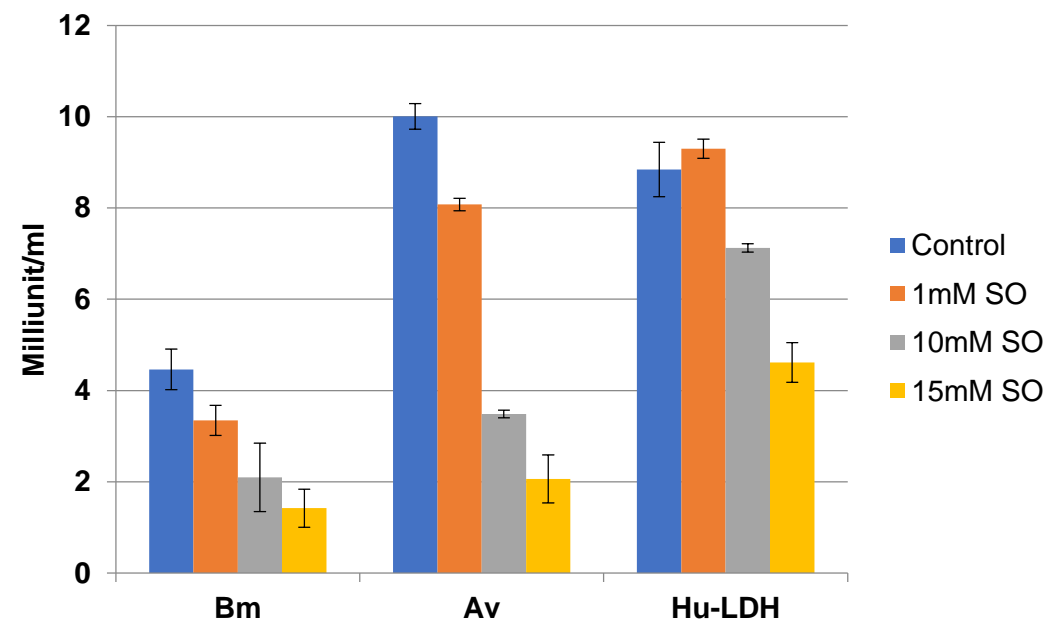

Supplement: ppat.1008085.s003.pdf [file ppat.1008085.s003.pdf]
